# Supplementary material for: Compensatory mechanisms in resistant Anopheles gambiae AcerKis and KdrKis neurons modulate insecticide-based mosquito control
Source: PubMed Central journal article supplement (PMC8172894; doi:10.1038/s42003-021-02192-0), 2021-06-02
Supplement: 42003_2021_2192_MOESM1_ESM.pdf [file 42003_2021_2192_MOESM1_ESM.pdf]

## SUPPLEMENTARY INFORMATIONS :

### **Compensatory mechanisms in resistant *Anopheles gambiae* AcerKis and KdrKis neurons modulate insecticide-based mosquito control**

Stéphane Perrier<sup>1</sup>, Eléonore Moreau<sup>1</sup>, Caroline Deshayes<sup>1</sup>, Marine El-Adouzi<sup>1</sup>, Delphine Goven<sup>1</sup>, Fabrice Chandre<sup>2</sup> & Bruno Lapied<sup>1\*</sup>

<sup>1</sup>Univ Angers, INRAE, SIFCIR, *SFR QUASAV*, F-49000 Angers, France

<sup>2</sup>MIVEGEC, UMR IRD 224-CNRS 5290-Université de Montpellier, 911 avenue Agropolis, 34394 Montpellier Cedex 05, France.

\*Corresponding author: Prof. B. Lapied, laboratoire SiFCIR, UFR Sciences, 2 boulevard Lavoisier, 49045 Angers, cedex, France; E-mail adress : [bruno.lapied@univ-angers.fr](mailto:bruno.lapied@univ-angers.fr)

**Supplementary Table 1** Voltage dependence of activation and inactivation of inward sodium and calcium currents in Kis and KdrKis neurons.

| Sodium currents  |                 | Kis neurons                | KdrKis neurons            |
|------------------|-----------------|----------------------------|---------------------------|
| Activation       | $V_{0.51}$ (mV) | $-55,49 \pm 1,99$ (n=8-10) | $-55,73 \pm 1,78$ (n=5-7) |
|                  | k1 (mV)         | $6,71 \pm 0,84$ (n=8-10)   | $5,73 \pm 1,64$ (n=5-7)   |
|                  | $V_{0.52}$ (mV) | $-16,68 \pm 1,86$ (n=8-10) | $-21,31 \pm 1,62$ (n=5-7) |
|                  | k2 (mV)         | $5,78 \pm 0,56$ (n=8-10)   | $4,11 \pm 0,64$ (n=5-7)   |
|                  |                 |                            |                           |
| Inactivation     | $V_{0.5}$ (mV)  | $-48,50 \pm 3,55$ (n=5-8)  | $-46,99 \pm 4,40$ (n=2-4) |
|                  | k (mV)          | $10,56 \pm 1,07$ (n=5-8)   | $14,87 \pm 1,88$ (n=2-4)  |
|                  |                 |                            |                           |
| Calcium currents |                 | Kis neurons                | KdrKis neurons            |
| Inactivation     | $V_{0.5}$ (mV)  | $-24.18 \pm 2.17$ (n=7)    | $-23.03 \pm 0.70$ (n=4)   |
|                  | k (mV)          | $8.34 \pm 2.20$ (n=7)      | $6.35 \pm 2.14$ (n=4)     |

The number of experiments (n) are biologically independent samples.

**Supplementary Table 2** Primers used for RT-qPCR analysis of voltage-gated calcium channels expression level in Kis and AcerKis neurons.

| Gene              | GenBank<br>Accession<br>number | Forward primer (5' to 3')   | Reverse primer (3' to 5')   |
|-------------------|--------------------------------|-----------------------------|-----------------------------|
| rps7              | XM_314557.3                    | GCCATCCTGGAGCTGGAGAT<br>GAA | GACGGGTCTGTACCTTCT<br>GGA   |
| actin             | XM_315271.4                    | CAGTCCAAGCGTGGTATCCT<br>CA  | CTCAGTCAGCAGGACTGG<br>GTGCT |
| Ca <sub>v</sub> 1 | EF595743.1                     | TTCGATGAAGTTTTACCGCCA<br>AC | TGCTAGAACCACCCTTCAT<br>TCC  |

## Supplementary Figure 1

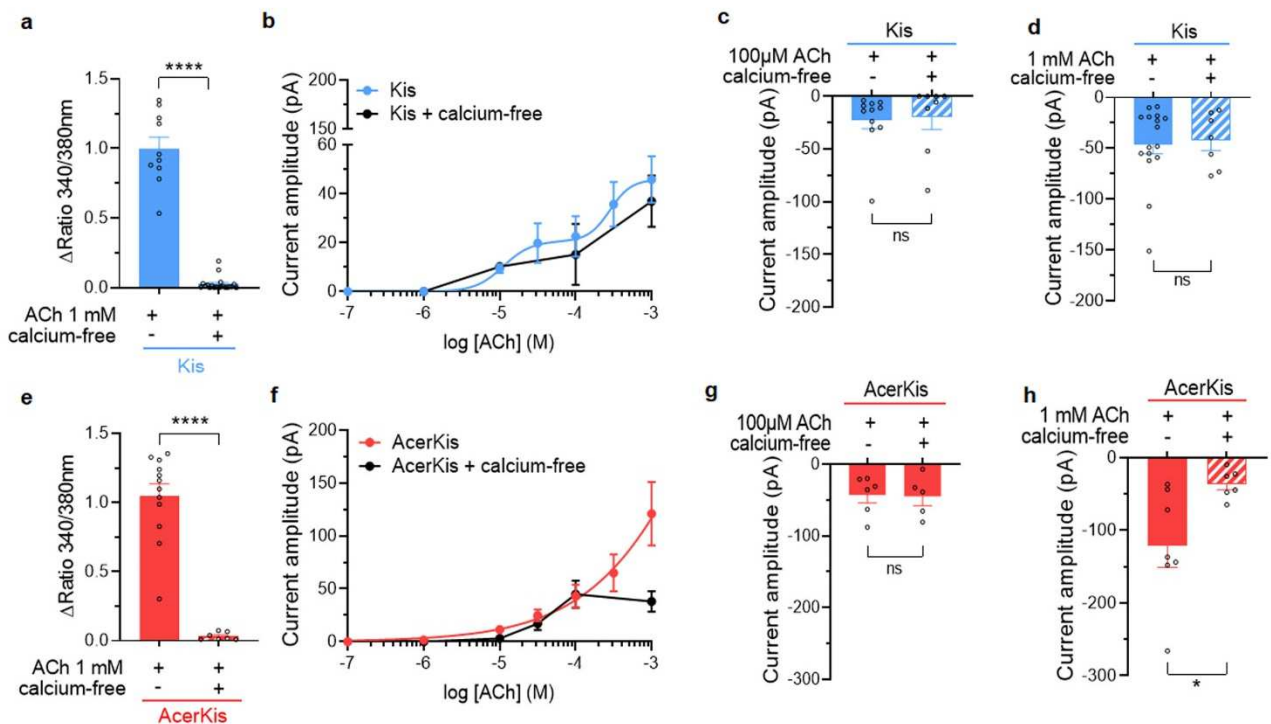

**Supplementary Figure 1 Calcium free solution has different effects on the ACh-induced inward current recorded in neurons isolated from Kis and AcerKis strains.** **a, e** Comparative histogram illustrating the effects of calcium free solution on the ACh-induced  $[Ca^{2+}]_i$  rise (expressed as ratio 340/380 nm) measured in Fura-2-loaded Kis (**a**) and AcerKis (**e**) neuron cell bodies. In both cases, calcium free solution strongly decreases the intracellular calcium elevation evoked by ACh in Kis (**a**, control,  $n=10$ ; in the presence of calcium free solution,  $n=20$ ) and AcerKis neurons (**c**, control,  $n=12$ ; in the presence of calcium free solution,  $n=6$ ). Bars represent mean  $\pm$  S.E.M.. The statistical test used was Student unpaired t-test, \*\*\*\*,  $p < 0.0001$ . **b, f** Superposed semi-logarithmic dose-response curves for the ACh-induced currents recorded in control and in the presence of calcium-free solution at a holding potential of  $-50$  mV in isolated neurons from mosquito strains Kis (**b**, control,  $n=5-16$ ; in the presence of calcium-free solution,  $n=5-6$ ) and AcerKis (**f**, control,  $n=3-14$ ; in the presence of calcium-free solution,  $n=5-9$ ), as indicated in the graph. Data are mean  $\pm$  S.E.M.. Note that calcium -free solution only reduced the ACh-induced current amplitude for concentrations higher than  $100 \mu\text{M}$

in AcerKis neurons. **c, d** Comparative histogram illustrating the lack of effect of calcium-free solution on the ACh-induced current amplitudes recorded at two different concentrations in Kis neurons (**c**, 100 $\mu$ M ACh, control n=11 ; in the presence of calcium-free solution, n=9 and **d**, 1mM ACh, control n=16 ; in the presence of calcium-free solution n=7). Bars represent mean  $\pm$  S.E.M. The statistical test used was Student unpaired t-test, ns, non-significant. **g, h** Comparative histogram illustrating the effect of calcium-free solution on the ACh-induced current amplitudes recorded at two different concentrations in AcerKis neurons (**g**, 100 $\mu$ M ACh, control, n=6 ; in the presence of calcium free solution, n=5 and **h**, 1mM ACh, control n=7 ; in the presence of calcium free solution, n=6). Bars represent mean  $\pm$  S.E.M. The statistical test used was Student unpaired t-test, ns, non-significant, \*,  $p < 0.05$ . In all cases, the number of experiments (n) are biologically independent samples.
