# Supplementary material for: Compensatory mechanisms in resistant Anopheles gambiae AcerKis and KdrKis neurons modulate insecticide-based mosquito control
Source: PubMed Central journal article supplement (PMC8172894; doi:10.1038/s42003-021-02192-0), 2021-06-02
Supplement: 42003_2021_2192_MOESM4_ESM.pdf [file 42003_2021_2192_MOESM4_ESM.pdf]

## **Description of Additional Supplementary Files**

**File name:** Supplementary Movie 1

**Description:** All source data generated and analysed during the current study.
